# Supplementary material
Source: Springer Nature journal article supplement (https://www.springermedizin.de/resource/supplementary/13643_2013_223_MOESM11_ESM.pdf/9681846)
Supplement: MOESM11 [file 9681846]

Additional file 11: *Quality of evidence tables*

Quality of evidence domains for brief intervention (**BI**) vs. **no BI** in participants screened for at-risk substance use.

| Outcome                                                                                                                                                                                                                                                     | Study Limitations (risk of bias)             | Inconsistency                         | Indirectness           | Imprecision                                                                                                                                                            | Publication bias                                                                  |
|-------------------------------------------------------------------------------------------------------------------------------------------------------------------------------------------------------------------------------------------------------------|----------------------------------------------|---------------------------------------|------------------------|------------------------------------------------------------------------------------------------------------------------------------------------------------------------|-----------------------------------------------------------------------------------|
| <b>PRIMARY OUTCOMES</b>                                                                                                                                                                                                                                     |                                              |                                       |                        |                                                                                                                                                                        |                                                                                   |
| <b>Substance use</b>                                                                                                                                                                                                                                        | n/a                                          | Not estimable                         | 0 (0)                  | n/a                                                                                                                                                                    | Not measured.                                                                     |
| <b>Frequency of use [1]</b><br><ul style="list-style-type: none"> <li>• Use of Cannabis / Other drugs<sup>1</sup></li> <li>• Days abstinent</li> </ul> Past 30-day use using a modified timeline follow-back interview.<br><b>Follow-up: 1 and 3 months</b> | Very serious limitations (high risk of bias) | No serious limitations (1 study only) | No serious limitations | Serious limitations<br>One study assessed outcomes (lack of scientific replication). Less than 400 participants in analysis.                                           | No serious limitations<br>This study small and NS, not likely to be other studies |
| <b>ASSIST score (composite outcome<sup>2</sup>) – All substances [2]</b> Sum score. Higher score interpreted as higher substance involvement (range 0 to 27+ points).<br><b>Follow-up: 3 months</b>                                                         | Serious limitations (medium risk of bias)    | No serious limitations (1 study)      | No serious limitations | Serious limitations<br>One study assessed this outcome (lack of scientific replication). Minimum important difference difficult to determine with the composite score. | No serious limitations<br>This study small and NS, not likely to be other studies |
| <b>SECONDARY OUTCOMES</b>                                                                                                                                                                                                                                   |                                              |                                       |                        |                                                                                                                                                                        |                                                                                   |
| <b>Other health measures</b><br><ul style="list-style-type: none"> <li>• Use of drop-in services</li> <li>• Use of additional services</li> <li>• Use of other agency services</li> </ul>                                                                   | Very serious limitations (high risk of bias) | No serious limitations (1 study only) | No serious limitations | Serious limitations<br>One study assessed outcomes (lack of scientific replication). Less than 400 participants in analysis.                                           | No serious limitations<br>This study small and NS, not likely to be other studies |

| Outcome                          | Study Limitations (risk of bias) | Inconsistency | Indirectness | Imprecision | Publication bias |
|----------------------------------|----------------------------------|---------------|--------------|-------------|------------------|
| <b>Follow-up: 1 and 3 mo [1]</b> |                                  |               |              |             |                  |

\*Abbreviations: ASSIST = Alcohol, Smoking and Substance Involvement Screening Test; CI = confidence interval; d=days; MD = mean difference; mo=months; RR = risk ratio.

Footnotes:

<sup>1</sup>Drugs other than tobacco, alcohol, cannabis were assessed.

<sup>2</sup>Composite outcome: substance use, frequency of use, use-related harms or negatives consequences, intention to reduce substance use, another person concerned with use, use of drug by injection.

Quality of evidence domains for **brief intervention vs. written information** in participants screened for at-risk substance use.

| Outcome                                                                                                                                                                         | Follow-up | Risk of bias                                                     | Inconsistency          | Indirectness           | Imprecision                                                                                                                                                                                                                        | Publication bias                                                                                                                                                                                                        |
|---------------------------------------------------------------------------------------------------------------------------------------------------------------------------------|-----------|------------------------------------------------------------------|------------------------|------------------------|------------------------------------------------------------------------------------------------------------------------------------------------------------------------------------------------------------------------------------|-------------------------------------------------------------------------------------------------------------------------------------------------------------------------------------------------------------------------|
| <b>PRIMARY OUTCOMES</b>                                                                                                                                                         |           |                                                                  |                        |                        |                                                                                                                                                                                                                                    |                                                                                                                                                                                                                         |
| <b>Substance use</b>                                                                                                                                                            |           |                                                                  |                        |                        |                                                                                                                                                                                                                                    |                                                                                                                                                                                                                         |
| <b>Abstinence – All substances</b><br>Cannabis [3]; Any prescription drugs (Sedatives/hypnotics/opioids) [4].<br>Assessment: Self-report (past 30 days) and NR (past 3 months). | 3 mo      | Very serious limitations<br>[3] - medium risk<br>[4] - high risk | No serious limitations | No serious limitations | Very serious limitations<br>Total events <300 and sample size <2000. CI for one study included both appreciable harm and benefit. Most likely also the case with the unit-of-analysis error study if appropriate corrections made. | No serious limitations<br>Although a few number of studies located, mixed results in statistical significance for an important outcome (abstinence) exists among them. We feel there is a low risk of publication bias. |
| <b>Abstinence – Cocaine/heroin [5]; objective</b>                                                                                                                               | 6 mo      | Serious limitations                                              | No serious limitations | No serious limitations | Serious limitations<br>CI shows both appreciable benefit and harm. One study                                                                                                                                                       | No serious limitations<br>Although a few number of studies located, mixed results in                                                                                                                                    |

| Outcome                                                                                                                                                                   | Follow-up   | Risk of bias                                                                     | Inconsistency                            | Indirectness           | Imprecision                                                                                                                                                                        | Publication bias                                                                                                                                                                                                        |
|---------------------------------------------------------------------------------------------------------------------------------------------------------------------------|-------------|----------------------------------------------------------------------------------|------------------------------------------|------------------------|------------------------------------------------------------------------------------------------------------------------------------------------------------------------------------|-------------------------------------------------------------------------------------------------------------------------------------------------------------------------------------------------------------------------|
| assessment (past 30 days)                                                                                                                                                 |             |                                                                                  |                                          |                        | assessed outcome at 6 months.                                                                                                                                                      | statistical significance for an important outcome (abstinence) exists among them. We feel there is a low risk of publication bias.                                                                                      |
| <b>Abstinence – All Substances</b><br>Cannabis [3]; any prescription drug (Sedatives/hypnotics/opioids) [4]<br>Mix of self-report (past 30 days), and NR (past 3 months). | 12 mo       | Very serious limitations<br>[3] – medium risk<br>[4] - high risk                 | No serious limitations                   | No serious limitations | Serious limitations<br>Total events <300 and sample size <2000. CI for one study included both appreciable harm and benefit.                                                       | No serious limitations<br>Although a few number of studies located, mixed results in statistical significance for an important outcome (abstinence) exists among them. We feel there is a low risk of publication bias. |
| <b>High on cannabis</b><br>Measured within past 30 days using Timeline Followback Calendar [3].                                                                           | 3 and 12 mo | 3 mo: Serious limitations (medium)<br><br>12 mo: very serious limitations (high) | No serious limitations<br>(1 study only) | No serious limitations | Serious limitations<br>Total events <300 and sample size <2000. One study assessed outcome (lack of scientific replication).                                                       | No serious limitations<br>Although a few number of studies located, mixed results in statistical significance for an important outcome (abstinence) exists among them. We feel there is a low risk of publication bias. |
| <b>Reducing use &gt;25% - Any prescription drug [4]</b>                                                                                                                   | 3 and 12 mo | Very serious limitations (high)                                                  | No serious limitations<br>(1 study only) | No serious limitations | Serious limitations<br>Total events <300 and sample size <2000. One study assessed outcome (lack of scientific replication).<br>12 mo: CI includes no effect and appreciable harm. | No serious limitations<br>Although a few number of studies located, mixed results in statistical significance for an important outcome (abstinence) exists among them. We feel there is a low risk of publication bias. |

| Outcome                                                                                                                                                                              | Follow-up   | Risk of bias                    | Inconsistency                         | Indirectness           | Imprecision                                                                                                                                                                                                                                                  | Publication bias                                                                                                                                                                                                        |
|--------------------------------------------------------------------------------------------------------------------------------------------------------------------------------------|-------------|---------------------------------|---------------------------------------|------------------------|--------------------------------------------------------------------------------------------------------------------------------------------------------------------------------------------------------------------------------------------------------------|-------------------------------------------------------------------------------------------------------------------------------------------------------------------------------------------------------------------------|
| <b>Frequency of use</b>                                                                                                                                                              |             |                                 |                                       |                        |                                                                                                                                                                                                                                                              |                                                                                                                                                                                                                         |
| <b>Change in cannabis consumption.</b><br>Change from baseline, measured within past 30 days using Timeline Followback Calendar [3].                                                 | 3 and 12 mo | Serious limitations (medium)    | No serious limitations (1 study only) | No serious limitations | Serious limitations<br>Population size <400. One study assessed outcome (lack of scientific replication).                                                                                                                                                    | No serious limitations<br>Although a few number of studies located, mixed results in statistical significance for an important outcome (abstinence) exists among them. We feel there is a low risk of publication bias. |
| <b>Quantity of use</b>                                                                                                                                                               |             |                                 |                                       |                        |                                                                                                                                                                                                                                                              |                                                                                                                                                                                                                         |
| <b>Reduction of defined daily dosage – Any prescription drug</b><br><br>Patient's dose of a given prescription drug per day (in mg) divided by the product-specific WHO measure [4]. | 3 and 12 mo | Very serious limitations (high) | No serious limitations (1 study only) | No serious limitations | Serious limitations<br>Total population size <400. One study assessed outcome (lack of scientific replication).                                                                                                                                              | No serious limitations<br>Although a few number of studies located, mixed results in statistical significance for an important outcome (abstinence) exists among them. We feel there is a low risk of publication bias. |
| <b>Change in drug level</b><br>- Cocaine<br>- Opioids<br><br>Biochemical hair analysis [5]                                                                                           | 6 mo        | Serious limitations (medium)    | No serious limitations (1 study only) | No serious limitations | Serious limitations<br>Total population size <400. One study assessed outcome (lack of scientific replication).<br><br>Information poorly reported – p value only provided. We do not know width of CI and therefore are uncertain how precise the data are. | No serious limitations<br>Although a few number of studies located, mixed results in statistical significance for an important outcome (abstinence) exists among them. We feel there is a low risk of publication bias. |
| <b>Use-related harms or negative consequences of use</b>                                                                                                                             |             |                                 |                                       |                        |                                                                                                                                                                                                                                                              |                                                                                                                                                                                                                         |

| Outcome                                                                              | Follow-up   | Risk of bias                 | Inconsistency                         | Indirectness           | Imprecision                                                                                                                                                                                                                                                 | Publication bias                                                                                                                                                                                                        |
|--------------------------------------------------------------------------------------|-------------|------------------------------|---------------------------------------|------------------------|-------------------------------------------------------------------------------------------------------------------------------------------------------------------------------------------------------------------------------------------------------------|-------------------------------------------------------------------------------------------------------------------------------------------------------------------------------------------------------------------------|
| <b>Carried a weapon.</b> Past 30 days (gun, knife, club) [3]. (330)                  | 3 and 12 mo | Serious limitations (medium) | No serious limitations (1 study only) | No serious limitations | Serious limitations<br>Total events <300 and sample size <2000. One study assessed outcome (lack of scientific replication).<br>3 mo: CI includes no effect and appreciable benefit.<br>12 mo: CI includes no effect and both appreciable benefit and harm. | No serious limitations<br>Although a few number of studies located, mixed results in statistical significance for an important outcome (abstinence) exists among them. We feel there is a low risk of publication bias. |
| <b>Drove a car after using cannabis.</b> Past 30 days [3].                           | 3 and 12 mo | Serious limitations (medium) | No serious limitations (1 study only) | No serious limitations | Very serious limitations<br>Total events <300 and sample size <2000. CI includes no effect and both appreciable benefit and harm. One study assessed outcome (lack of scientific replication).                                                              | No serious limitations<br>Although a few number of studies located, mixed results in statistical significance for an important outcome (abstinence) exists among them. We feel there is a low risk of publication bias. |
| <b>Rode in a car with a person drunk/high.</b> After cannabis use, past 30 days [3]. | 3 and 12 mo | Serious limitations (medium) | No serious limitations (1 study only) | No serious limitations | Very serious limitations<br>Total events <300 and sample size <2000. CI includes no effect and both appreciable benefit and harm. One study assessed outcome (lack of scientific replication).                                                              | No serious limitations<br>Although a few number of studies located, mixed results in statistical significance for an important outcome (abstinence) exists among them. We feel there is a low risk of publication bias. |
| <b>Physical fight.</b> Past 30 days [3].                                             | 3 and 12 mo | Serious limitations (medium) | No serious limitations (1 study only) | No serious limitations | Very serious limitations<br>Total events <300 and sample size <2000. One study assessed outcome (lack of scientific replication).                                                                                                                           | No serious limitations<br>Although a few number of studies located, mixed results in statistical significance for an important outcome (abstinence)                                                                     |

| Outcome                                              | Follow-up   | Risk of bias                 | Inconsistency                         | Indirectness           | Imprecision                                                                                                                                                                           | Publication bias                                                                                                                                                                                                        |
|------------------------------------------------------|-------------|------------------------------|---------------------------------------|------------------------|---------------------------------------------------------------------------------------------------------------------------------------------------------------------------------------|-------------------------------------------------------------------------------------------------------------------------------------------------------------------------------------------------------------------------|
|                                                      |             |                              |                                       |                        | 3 mo: CI includes no effect and both appreciable benefit and harm.                                                                                                                    | exists among them. We feel there is a low risk of publication bias.                                                                                                                                                     |
| <b>Positive behaviour change</b>                     |             |                              |                                       |                        |                                                                                                                                                                                       |                                                                                                                                                                                                                         |
| <b>Tried to cut back on cannabis use. [3]</b>        | 3 mo        | Serious limitations (medium) | No serious limitations (1 study only) | No serious limitations | Serious limitations<br>Total events <300 and sample size <2000. CI includes no effect and appreciable benefit.                                                                        | No serious limitations<br>Although a few number of studies located, mixed results in statistical significance for an important outcome (abstinence) exists among them. We feel there is a low risk of publication bias. |
|                                                      | 12 mo       | Serious limitations (medium) | No serious limitations (1 study only) | No serious limitations | Serious limitations<br>Total events <300 and sample size <2000. CI includes no effect and appreciable benefit. One study assessed outcome (lack of scientific replication).           | No serious limitations<br>Although a few number of studies located, mixed results in statistical significance for an important outcome (abstinence) exists among them. We feel there is a low risk of publication bias. |
| <b>Tried to stop using cannabis. [3]</b>             | 3 and 12 mo | Serious limitations (medium) | No serious limitations (1 study only) | No serious limitations | Serious limitations<br>Total events <300 and sample size <2000. One study assessed outcome (lack of scientific replication).<br>12 mo: CI includes no effect and appreciable benefit. | No serious limitations<br>Although a few number of studies located, mixed results in statistical significance for an important outcome (abstinence) exists among them. We feel there is a low risk of publication bias. |
| <b>“Tried to be careful about situations you got</b> | 3 and 12 mo | Serious limitations (Medium) | No serious limitations (1 study only) | No serious limitations | Serious limitations<br>Total events <300 and sample size <2000. One study                                                                                                             | No serious limitations<br>Although a few number of studies located, mixed results in                                                                                                                                    |

| Outcome                                                                                                          | Follow-up                         | Risk of bias                 | Inconsistency                         | Indirectness           | Imprecision                                                                                                                                                                                                                                                       | Publication bias                                                                                                                                                                                                        |
|------------------------------------------------------------------------------------------------------------------|-----------------------------------|------------------------------|---------------------------------------|------------------------|-------------------------------------------------------------------------------------------------------------------------------------------------------------------------------------------------------------------------------------------------------------------|-------------------------------------------------------------------------------------------------------------------------------------------------------------------------------------------------------------------------|
| <b>into when using cannabis” [3]</b>                                                                             |                                   |                              |                                       |                        | assessed outcome (lack of scientific replication).<br>3 mo: CI includes no effect and appreciable benefit.                                                                                                                                                        | statistical significance for an important outcome (abstinence) exists among them. We feel there is a low risk of publication bias.                                                                                      |
| <b>Other health measures</b>                                                                                     |                                   |                              |                                       |                        |                                                                                                                                                                                                                                                                   |                                                                                                                                                                                                                         |
| <b>Felt unsafe in the past 30 days. [3]</b>                                                                      | 3 and 12 mo                       | Serious limitations (medium) | No serious limitations (1 study only) | No serious limitations | Serious limitations<br>Total events <300 and sample size <2000. One study assessed outcome (lack of scientific replication).<br>3 mo: CI includes no effect and appreciable benefit.                                                                              | No serious limitations<br>Although a few number of studies located, mixed results in statistical significance for an important outcome (abstinence) exists among them. We feel there is a low risk of publication bias. |
| <b>Change in ASI composite score from baseline – Cocaine and/or heroin</b><br><br>Drug and medical subscales [5] | 3 mo                              | Serious limitations (medium) | No serious limitations (1 study only) | No serious limitations | Serious limitations<br>Authors only state not significant, no data are provided to calculate an effect estimate and confidence interval. Accordingly, we do not know how precise the results are.<br>One study assessed outcome (lack of scientific replication). | No serious limitations<br>Although a few number of studies located, mixed results in statistical significance for an important outcome (abstinence) exists among them. We feel there is a low risk of publication bias. |
|                                                                                                                  | Drug - 6 mo<br><br>Medical – 6 mo | Serious limitations (medium) | No serious limitations (1 study only) | No serious limitations | Serious limitations<br>Information poorly reported – p value only provided. We do not know width of CI and therefore are uncertain how precise the data are.<br>One study assessed outcome                                                                        | No serious limitations<br>Although a few number of studies located, mixed results in statistical significance for an important outcome (abstinence) exists among them. We feel there is a low risk of publication bias. |

| Outcome | Follow-up | Risk of bias | Inconsistency | Indirectness | imprecision<br>(lack of scientific replication). | Publication bias |
|---------|-----------|--------------|---------------|--------------|--------------------------------------------------|------------------|
|         |           |              |               |              |                                                  |                  |



## References

1. Baer JS, Garrett SB, Beadnell B, Wells EA, Peterson PL: Brief motivational intervention with homeless adolescents: evaluating effects on substance use and service utilization. *Psychol Addict Behav* 2007, 21(4):582-586.
2. Humeniuk R, Dennington V, Ali R: *The Effectiveness of a Brief Intervention for Illicit Drugs Linked to the Alcohol, Smoking and Substance Involvement Screening Test (ASSIST) in Primary Health Care Settings: A Technical Report of Phase III Findings of the WHO ASSIST Randomized Controlled Trial*. World Health Organization; 2008.
3. Bernstein E, Edwards E, Dorfman D, Heeren T, Bliss C, Bernstein J: Screening and brief intervention to reduce marijuana use among youth and young adults in a pediatric emergency department. *Academic emergency medicine : official journal of the Society for Academic Emergency Medicine* 2009, 16(11):1174-1185.
4. Zahradnik A, Otto C, Crackau B, Lohrmann I, Bischof G, John U, Rumpf HJ: Randomized controlled trial of a brief intervention for problematic prescription drug use in non-treatment-seeking patients. *Addiction* 2009, 104(1):109-117.
5. Bernstein J, Bernstein E, Tassiopoulos K, Heeren T, Levenson S, Hingson R: Brief motivational intervention at a clinic visit reduces cocaine and heroin use. *Drug and Alcohol Dependence* 2005, 77(1):49-59.
